# Supplementary material
Source: PubMed Central journal article supplement (PMC5902805)
Supplement: NIHMS956106-supplement-Supplementary_data.pdf [file NIHMS956106-supplement-Supplementary_data.pdf]

## SUPPLEMENTARY MATERIAL AND METHODS

**Western blots and immunoprecipitation.** Nuclear extracts from COS-7 and CHO-K1 were used for western immunoblots with polyclonal anti-ZEB1 antibody (anti-ZEB1-HD) against the homeodomain of ZEB1. When whole CHO-K1 extracts were assayed, cell lysates were collected using modified RIPA lysis buffer. Lysates included a mixture of protease and/or phosphatase inhibitors (Roche, Indianapolis, IN, USA) as appropriate. For immunoprecipitation,  $1.5 \times 10^6$  CHO-K1 cells were transfected with 60  $\mu\text{g}$  of the  $\Delta\text{ZD1}$  (pcDNA1/ $\Delta\text{ZD1}$ ) or ZD2E (pcDNA1/ZD2E) DNAs, or the empty vector pcDNA1 by the PEI method. Cell lysates were obtained and 200  $\mu\text{g}$  of protein immunoprecipitated with 4  $\mu\text{g}$  of ZEB1 R17 antibody or an equivalent amount of anti-ZEB1-HD antibody. After immune-complex absorption to Protein A agarose and washing, the samples were boiled in Laemmli buffer, and centrifuged. The eluted protein was loaded onto 10% SDS-PAGE gels. The blots were blocked and incubated with phospho-TP MAPK/CDK substrate mouse monoclonal antibody (1:5000) (Cell Signalling, Danvers, MA, USA), followed by horseradish peroxidase (HRP)-conjugated anti-mouse IgG (Amersham, GE Healthcare, Piscataway, NJ, USA). Subsequently, blots were stripped and incubated with ZEB1 R17 antibody at 4°C overnight, followed by horseradish peroxidase-conjugated anti-goat IgG (Amersham, GE Healthcare, Piscataway, NJ, USA). The HRP conjugates were detected by chemiluminescence (Amersham ECL Western Blotting Reagent, GE Healthcare) detected by X-ray film for evaluation.

**Electrophoretic mobility shift assay (EMSA).** The source of ZEB1 protein was nuclear extracts (NE) from cell lines that express different amounts of native ZEB1, as described (Costantino et al., 2002). ZEB1-b, ZEB1-ZD2E and ZEB1-ZD2 proteins were synthesized by in vitro transcription/translation in rabbit reticulocyte lysates (RRL) according to the manufacturer's instructions (T7-TnT Quick Coupled Transcription/Translation System Promega, Madison, WI, USA). The oligonucleotides used for EMSA were obtained from Sigma Genosys (Sigma-Aldrich, Saint Louis, MO, USA) and are depicted in Supplementary Table 2. Double-stranded oligonucleotides were labelled with [ $^{32}\text{P}$ ]-dATP by fill-in with Klenow DNA polymerase I.

**SUPPLEMENTARY FIGURES AND TABLES**

S1

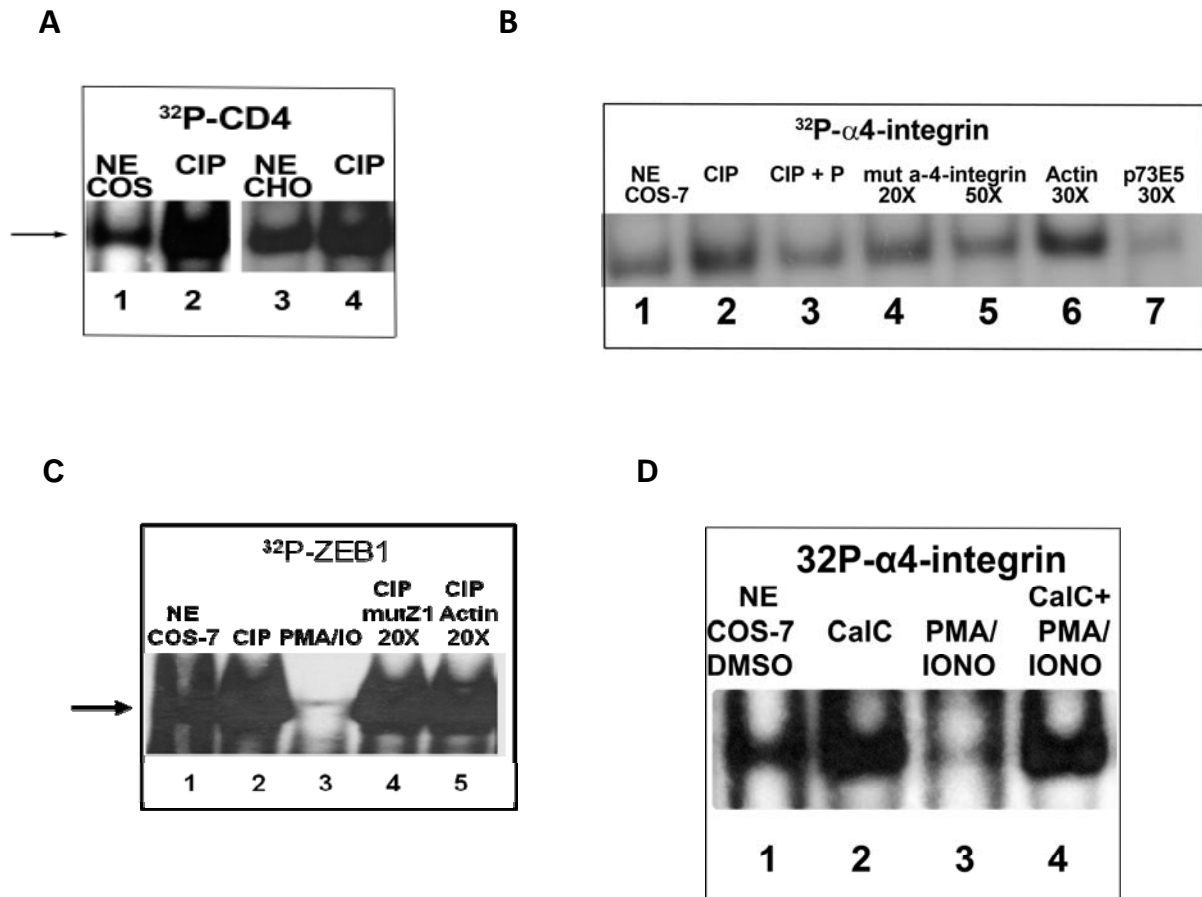

**SUPPLEMENTAL FIGURE 1. The phosphorylation state of ZEB1 changes its binding ability on its target genes. (S1A)** NE from COS-7 and CHO-K1 cells were incubated with [<sup>32</sup>P] CD4 CD4 and were untreated (lanes 1, 3) or treated with CIP enzyme. **(S1B)** NE from COS-7 cells were incubated with [<sup>32</sup>P] α4-integrin and either untreated (lane 1) or treated with CIP enzyme. The probe was competed by 20-50X excess of mutant α4-integrin cold oligonucleotide, 30X actin cold oligonucleotide or 30X p73E5 cold oligonucleotide. **(S1C)** NE from COS-7 cells were incubated with [<sup>32</sup>P] ZEB1 oligonucleotide and were untreated (lane 1) or treated with CIP enzyme (lanes 2, 4, 5). Alternatively, the cells were treated with PMA+IONO prior to making NE (lane 3). [<sup>32</sup>P] ZEB1 probe was competed by 20X excess of mutant ZEB1 oligonucleotide (4) or actin oligonucleotide (5). **(S1D)** COS-7 cells were incubated with DMSO (solvent) (1), and consecutively with Calphostin C (CalC) (2), PMA+Iono (3), and CalC-PMA+Iono (4) prior to making NE. NE from cells was incubated with [<sup>32</sup>P]α4-integrin for EMSA.

**Table 1**

| <b>Site-Directed Mutagenesis Oligonucleotides</b> |                                                 |
|---------------------------------------------------|-------------------------------------------------|
| <b>Oligo name</b>                                 | <b>Sequence (5' to 3')</b>                      |
| mZD2-1A forward                                   | CAG GAT GAA AGA CAA GAC GCT GCC GCA GAA GGA GTC |
| mZD2-1A reverse                                   | GTC TTG TCT TTC ATC CTG GTT TCC ATT TGG-3'      |
| mZD2-1B forward                                   | GCC GCA GAA GGA GTC GCC GTG GAG GAC CAG         |
| mZD2-1B reverse                                   | GAC TCC TTC TGC GGC AGC GTC TTG TCT TTC ATC     |
| mZD2-2A forward                                   | GAT ATT TCA GAA GAG CAG CGC CCT GCT GAG AC      |
| mZD2-2A reverse                                   | GCT GCT CTT CTG AAA TAT CTT GTC ACA CAG         |
| mZD2-2B forward                                   | TGT GGC AAG CGC TTC GAC TCG GGG GCT TAC TCT C   |
| mZD2-2B reverse                                   | GAA GCG CTT GCC ACA CTT GTC ACA TTG GTA GGG CTT |
| mZD2-2C forward                                   | CAC ATG AAT CAC CGC TAC GCC TAC TGC AAC AG      |
| mZD2-2C reverse                                   | GTA GCG GTG ATT CAT GTG TTG AGA GTA TGC         |
| ZEB1-T876A forward                                | CCA GAA TGA CTC TGA CTG CGC GCC ACC C           |
| ZEB1-T876A reverse                                | G GGT GGC GCG CAG TCA GAG TCA TTC TGG           |
| mZEB1 forward                                     | CAC CGT CGA CAG TCA GTA GCG TTT ACC             |
| mZEB1 reverse                                     | GAA TAG GGC CCT CTA GAA CTA GTG GAT CC          |

**TABLE 2.** Italic bold small characters indicate ZEB1 binding sites. Italic bold capital letters indicate mutated bases. Underlined bold letters indicate AP-2 binding site (one base –in italics- was changed to eliminate possible ZEB1 binding site). Capital letters are non genomic sequences, added for labeling purposes. With respect to the p73 gene, it is worth noting that Fontemaggi et al. (2001) identified five E-box /ZEB1 binding sites in the first intron of p73 gene. We designed two oligonucleotides for EMSAs that include E-box 5 (p73E5) and E-boxes 3 and 4 (p73 E3-4).

| <b>EMSA oligonucleotides</b>                 |                                                             |                              |                                                                                                                     |
|----------------------------------------------|-------------------------------------------------------------|------------------------------|---------------------------------------------------------------------------------------------------------------------|
| <b>Name of GENE</b>                          | <b>Location in Promoter</b>                                 | <b>Oligo name</b>            | <b>Sequence (5' to 3')</b>                                                                                          |
| <b>Human ZEB1</b>                            | –197 to –236 of the ZEB1 promoter (Manavella et al. 2007)   | BS2 U<br>BS2 L               | tctccccacca <b><i>cacctg</i></b> aggaaaaactttccctcgcccct<br>attgaggggagagggaaaagtttcct <b><i>cagggtg</i></b> ggtggg |
| <b>Human p73</b>                             | intron 1(Fontemaggi et al. 2001)                            | p73E5 U<br>p73E5 L           | CCTTgcaaggcggggg <b><i>cacctg</i></b> ctccagggatgc<br>GGTTgcatccctggag <b><i>cagggtg</i></b> ccccgccttgc            |
| <b>Human <math>\alpha</math>4-integrin</b>   | 1621 to 1650 in L26059 (Postigo et al. 1997)                | A4int361 U<br>A4int361 L     | GATTcactaccag ttc <b><i>cagggtg</i></b> ttgcgttg<br>TGTGcacaacgcaaca <b><i>cacctga</i></b> actgggtagtg              |
| <b>Mouse CD4</b>                             | 2222 to 2253 (AF 088189 genbank seq) (Brabletz et al. 1999) | CD4 U<br>CD4 L               | Tttctcaaagggtaa <b><i>cagggtg</i></b> cagctggctg<br>ggtcagccagctga <b><i>cacctgt</i></b> tacccttgg                  |
| <b>Human E-cadherin</b>                      | -13 to -38 of human E cadherin promoter                     | Ecadh E3 U<br>Ecadh E3 L     | AGTTtccgggct <b><i>cacctg</i></b> gctacagtac<br>AGTTgtgactgtagc <b><i>cagggtg</i></b> agccccgga                     |
| <b>Mutated p73</b>                           | intron 1                                                    | p73E5MutA<br>p73E5MutB       | CCTTgcaaggcggggg <b><i>cTcGAg</i></b> ctccagggatgc<br>GGTTgcatccctggag <b><i>cTCgAg</i></b> ccccgccttgc             |
| <b>Mutated <math>\alpha</math>4-integrin</b> | 1621 to 1650 in L26059                                      | A4int361MutA<br>A4int361MutB | GATTcactaccag ttc <b><i>caggtAtg</i></b> ttgcgttg<br>TGTGcacaacgcaaca <b><i>Tacctga</i></b> actgggtagtg             |
| <b>Mutated ZEB1</b>                          | –197 to –236 of the ZEB1 promoter                           | BS2mut U<br>BS2mut L         | Tctccccacca <b><i>CAtaTG</i></b> aggaaaaactttccctcgcccct<br>attgaggggagagggaaaagtttcct <b><i>cagggtg</i></b> ggtggg |

S2

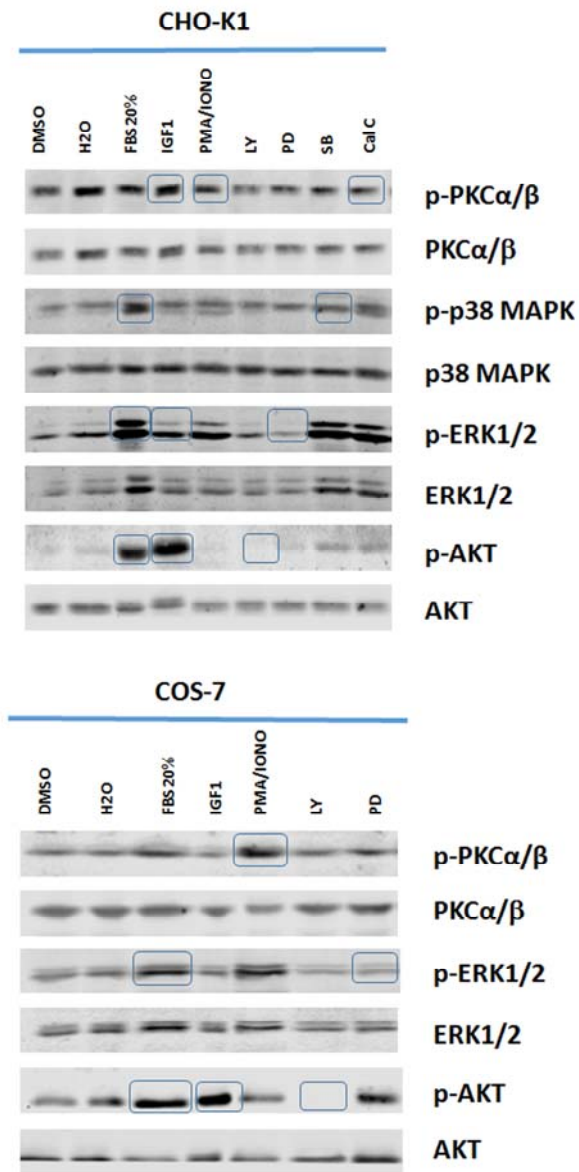

**SUPPLEMENTAL FIGURE 2. Effect of inhibitors and activators of intermediate signaling components on the activity of signaling pathways.** Representative immunoblot from two independent experiments showing phospho and total PKC  $\alpha/\beta$ , phospho and total p38 MAPK, phospho and total ERK1/2 and phospho and total AKT levels in CHO-K1 (upper blot) and COS-7 (lower blot) cells. Cells were pre-incubated with DMSO (solvent) or water (IGF-1 solvent), 20% Fetal Bovine Serum (FBS), 10 nM IGF-1, 40 ng/ml PMA plus 1  $\mu$ g/ml ionomycin (IONO); 10  $\mu$ M LY294002 (LY); 10  $\mu$ M PD98059 (PD); 10  $\mu$ M SB20358 (SB) and 50 nM Calphostin C (Cal C) as indicated in M&M. The expected specific responses are pointed out by a frame.

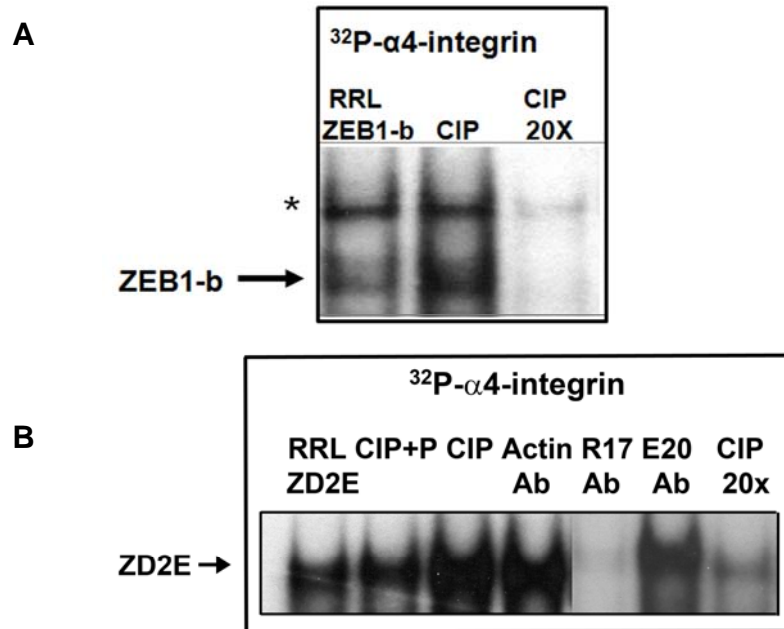

**SUPPLEMENTAL FIGURE 3. CIP treatment increases DNA binding of the ZEB1 deletion mutants ZEB1-b, or ZD2E.** EMSAs were performed with RRL programmed for ZEB1-b (**S3A**), or ZD2E (**S3B**) and were untreated (first lane on the left) or treated with CIP enzyme for 30 minutes. RRLs were incubated with [ $^{32}\text{P}$ ] $\alpha 4$ -integrin, and competed by 20X excess of cold  $\alpha 4$ -integrin. ZD2E bands were supershifted by N-terminus ZEB1 antibody (E20), C-terminus ZEB1 antibody (R17) or the unrelated anti-actin antibody. As expected, E20 and anti-actin Ab were not able to shift ZD2E band. \* non-specific band present in unprogrammed RRL.

S4

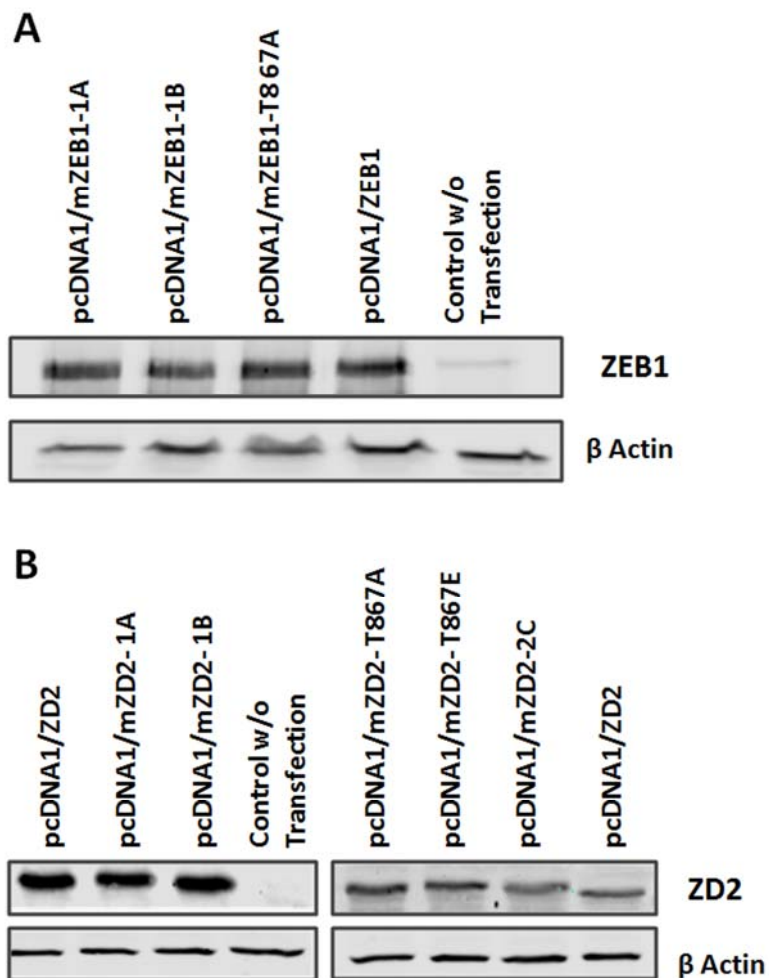

**SUPPLEMENTAL FIGURE 4. Immunoblots confirm similar levels of protein expression in wild type and mutant transfected clones. (S4A)** CHO-K1 cells were transfected with wild type (pCDNA1/ZEB1) or mutant (pCDNA1/mZEB1-1A, pCDNA1/mZEB1-1B, pCDNA1/mZEB1-T867A) clones as indicated in M&M. After 48 h, cells were analyzed by 8% SDS-PAGE and immunoblotting with antibodies against ZEB1. **(S4B)** CHO-K1 cells were transfected with wild type (pCDNA1/ZD2) or mutant (pCDNA1/mZD2-1A, pCDNA1/mZD2-1B, pCDNA1/mZD2-T867A, pCDNA1/mZD2-T867E and pCDNA1/mZD2-2C) clones as indicated in M&M. After 48 h, cells were analyzed by 12% SDS-PAGE and immunoblotting with antibodies against ZEB1.

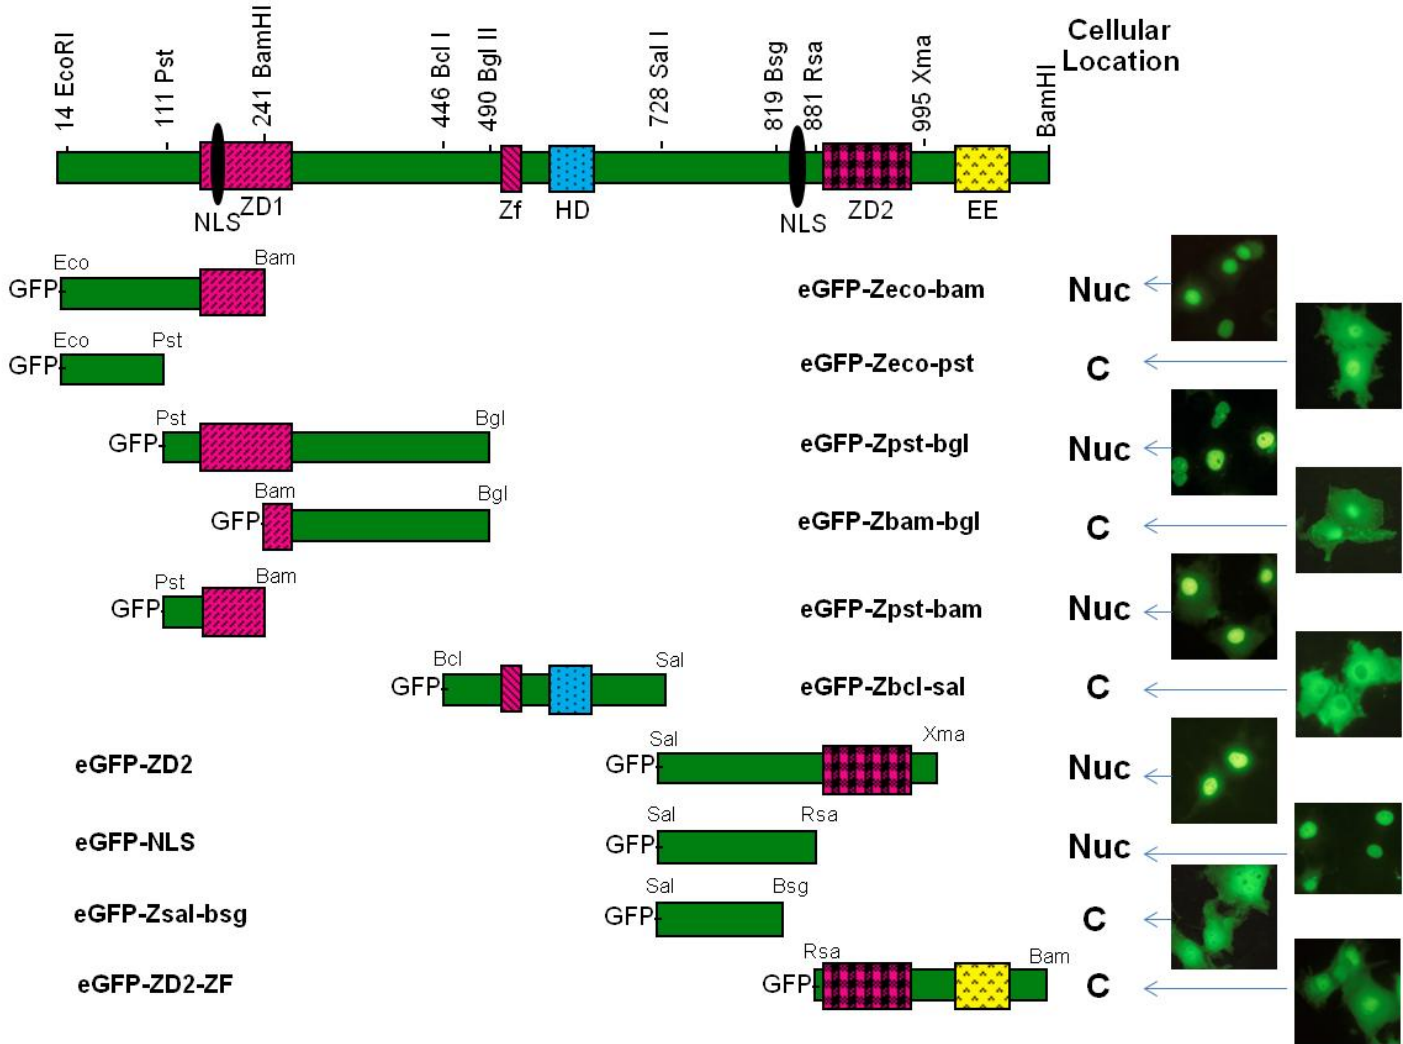

**SUPPLEMENTARY FIGURE 5. Representation of GFP-ZEB1 fusion proteins and two independent nuclear localization signals.** The major domains of rat ZEB1 are shown with a series of fusion proteins containing GFP and a portion of ZEB1. These clones were transfected into COS7 cells to test predicted NLS sequences. This identified a cryptic NLS within the first zinc finger domain, as well as a strong NLS immediately before the second zinc finger domain.



S6A

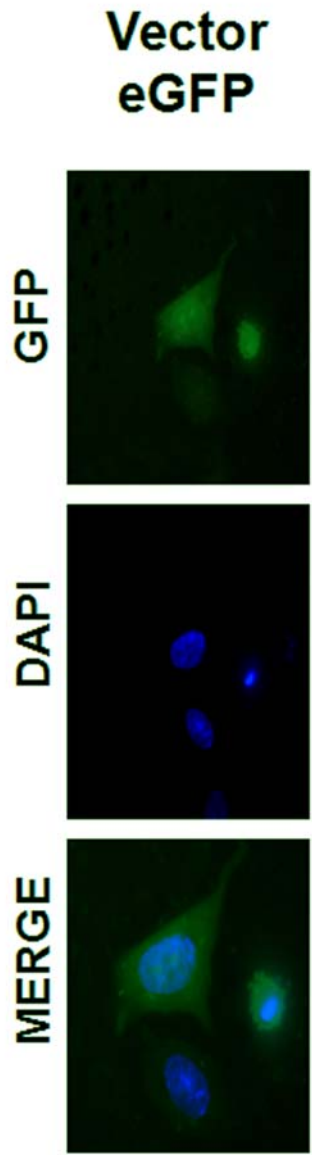

S6B

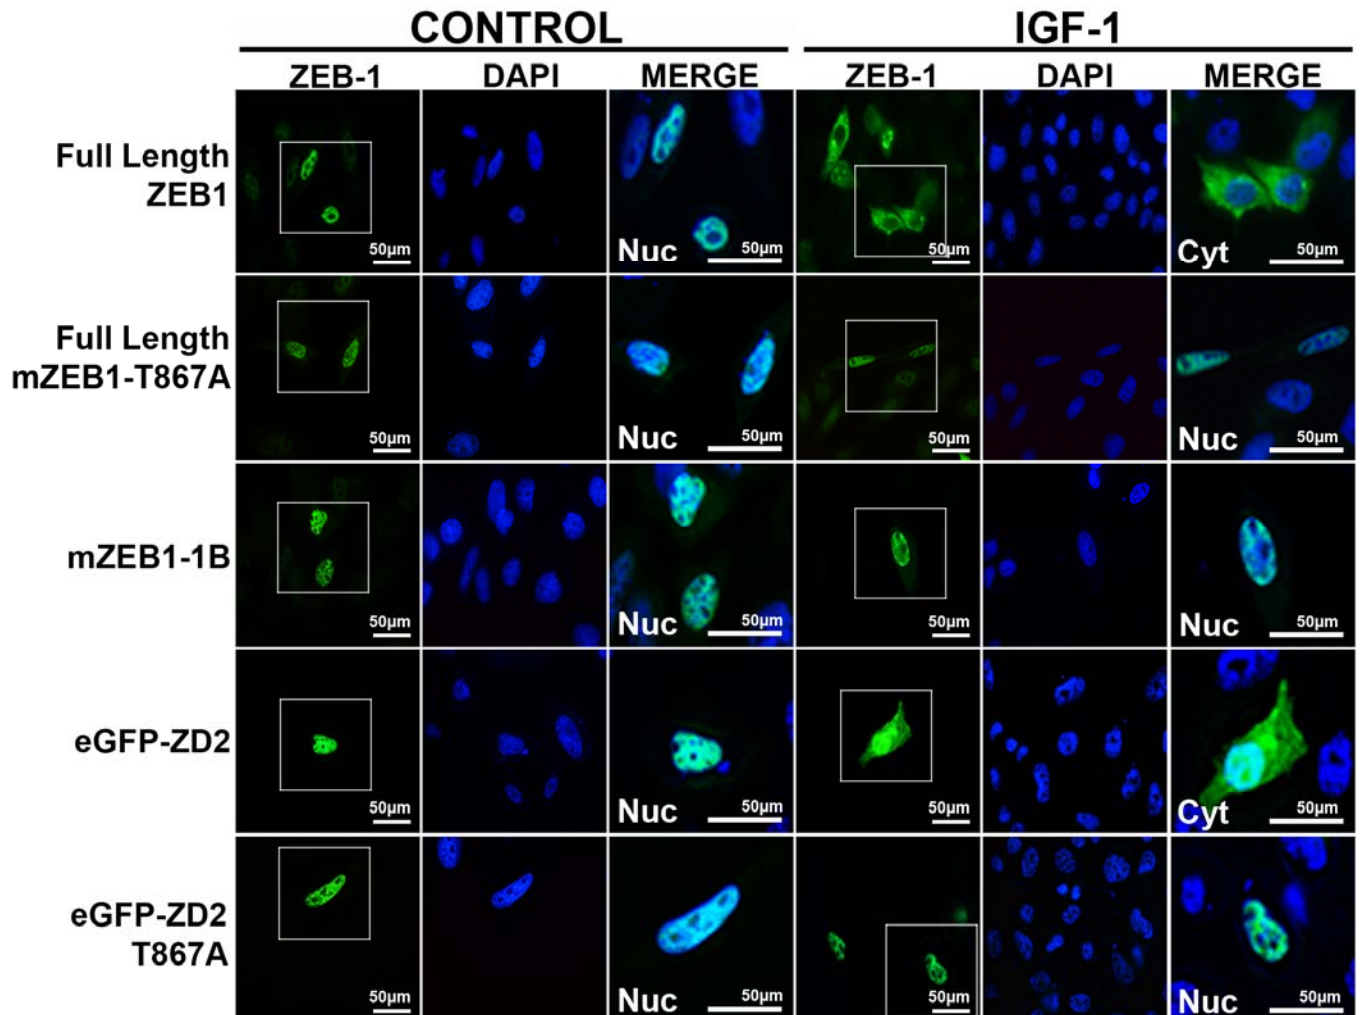

**SUPPLEMENTARY FIGURE 6. Immunofluorescence of cells transfected with ZEB1 mutants and GFP-ZD2 clones. (S6A)** CHO-K1 cells were transfected with eGFP Vector as a control. A merged figure is shown at the bottom panel. eGFP Vector shows fluorescence distribution at the cytosol. **(S6B)** Cells were treated with 10 nM rhIGF-1 for 1 h, and the localization of ZEB1 (green) was examined by immunofluorescence imaging. Cells transfected with GFP clones show the signal GFP as green. Specimens were counterstained with DAPI (blue) to visualize the cell nuclei. A merged figure is shown at the right panel of each treatment.
